# Supplementary material for: Dietary Tryptophan-Mediated Aryl Hydrocarbon Receptor Activation by the Gut Microbiota Alleviates Escherichia coli-Induced Endometritis in Mice
Source: PubMed Central journal article supplement (PMC9430277; doi:10.1128/spectrum.00811-22), 2022-06-21
Supplement: spectrum.00811-22-s0001.pdf [file spectrum.00811-22-s0001.pdf]

**Supplementary files for**

**Dietary tryptophan-mediated aryl hydrocarbon receptor activation by the gut microbiota  
alleviates *Escherichia coli*-induced endometritis in mice**

Caijun Zhao<sup>1</sup>, Lijuan Bao<sup>1</sup>, Min Qiu<sup>1</sup>, Lianjun Feng<sup>1</sup>, Luotong Chen<sup>1</sup>, Zhuoyu Liu<sup>1</sup>, Shiyu Duan<sup>1</sup>,  
Yihong Zhao<sup>1</sup>, Keyi Wu<sup>1</sup>, Naisheng Zhang<sup>1</sup>, Xiaoyu Hu<sup>1\*</sup>, Yunhe Fu<sup>1\*</sup>

1.Department of Clinical Veterinary Medicine, College of Veterinary Medicine, Jilin University,  
Changchun, Jilin Province 130062, China.

**\* Corresponding author:**

Yunhe Fu, E-mail: fuyunhesky@163.com.

Xiaoyu Hu, E-mail: hxiaoyu@yeah.net.

**This file includes:**

**Supplementary figures S1-S9**

**Supplementary table S1**

**Supplementary figures S1-S9**

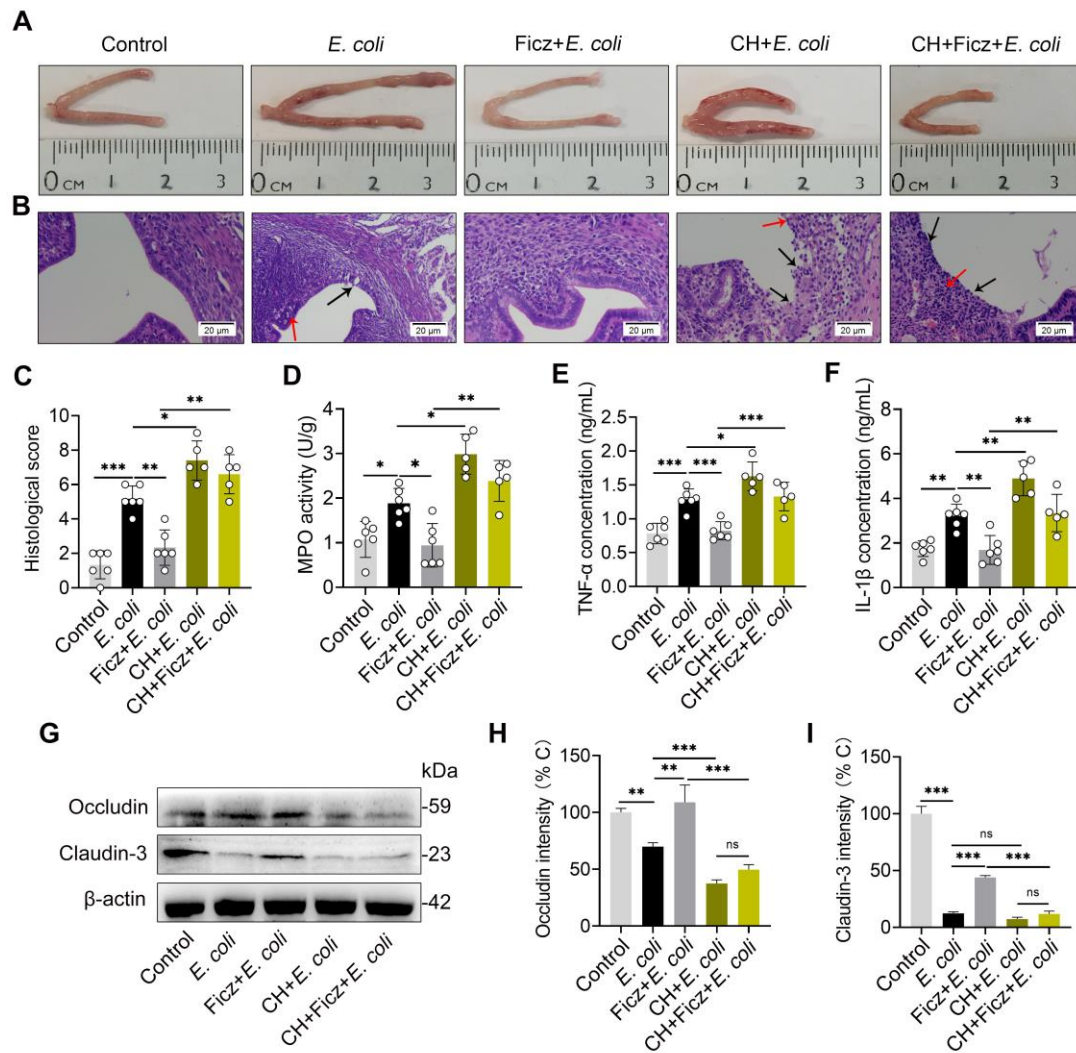

**Fig. S1 CH223191 treatment aggravates *E. coli*-induced endometritis.** Mice were pretreated with CH223191 (500 µg/kg BW) intraperitoneally 1 h before Ficiz (50 µg/kg BW) administration, followed by *E. coli* stimulation ( $10^8$  CFU/30 µL on each side of the uterus). **A.** Representative macroscopic images from indicated groups are shown. **B.** Representative H&E-stained images of uterine sections are shown. The black arrow indicates endometrial injury and the red arrow shows inflammatory cell infiltration (scale bar=20 µm) (n=5-6). **C-F.** Histological score (**C**), MPO activity (**D**), pro-inflammatory cytokines of TNF-α (**E**) and IL-1β (**F**) were assessed (n=5-6). **G.** Levels of uterine occludin and claudin-3 were assessed by western blotting (n=5). Intensity analysis of occludin (**H**) and claudin-3 (**I**) was performed based on western blotting (n=5). Data are expressed as the mean ± SD and one-way ANOVA (**C-F** and **H-I**) was performed. \* $p < 0.05$ , \*\* $p < 0.01$  and \*\*\* $p < 0.001$  indicate significant differences. ns, no significance. CH, CH223191.

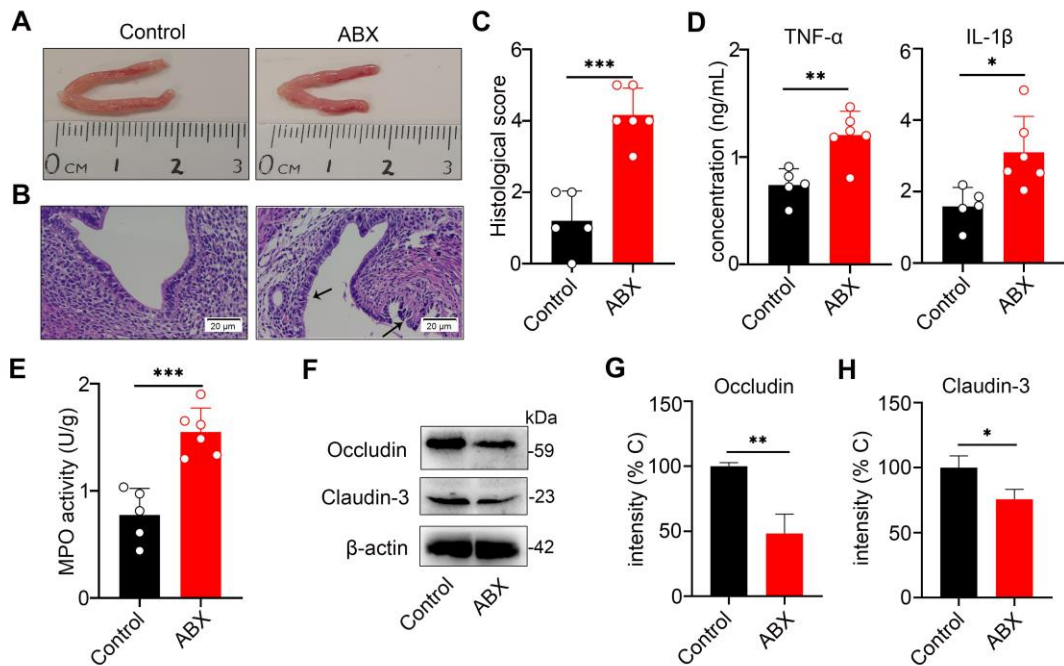

**Fig. S2 Gut dysbiosis induces endometrial inflammation in mice.** Mice were treated with ABX (1 g/L ampicillin, metronidazole and neomycin sulfate and 0.5 g/L vancomycin) for three weeks and uterine tissues were harvested. **A.** Representative macroscopic figures from different treatment groups are shown. **B.** Representative H&E-stained uterine sections are displayed. The black arrow shows endometrial damage (scale bar=20  $\mu$ m). Histological score (**C**), TNF- $\alpha$  and IL-1 $\beta$  (**D**) and MPO activity (**E**) from indicated groups were determined (n=5-6). **F.** Levels of uterine occludin and claudin-3 protein from indicated groups were assessed by western blotting. **G-H.** Intensity analysis of occludin (**G**) and claudin-3 (**H**) was determined (n=5). Data are expressed as the mean  $\pm$  SD and two-tailed Student's t test was performed (**C-E** and **G-H**). \* $p$  < 0.05, \*\* $p$  < 0.01 and \*\*\* $p$  < 0.001 indicate significant differences. ABX, cocktail of antibiotics.

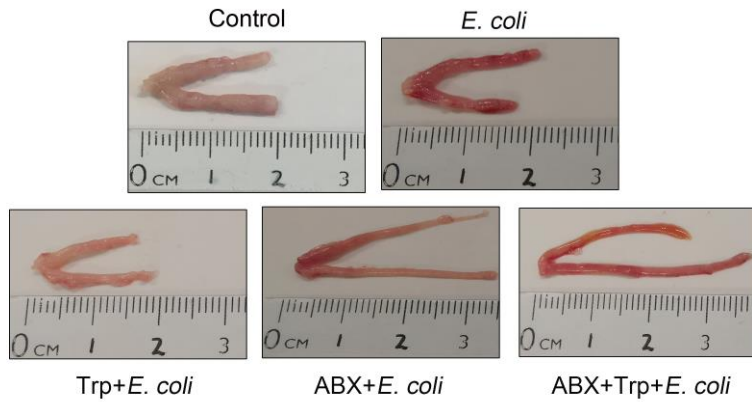

**Fig. S3** Representative macroscopic images of Trp treated mice with or without ABX are shown.

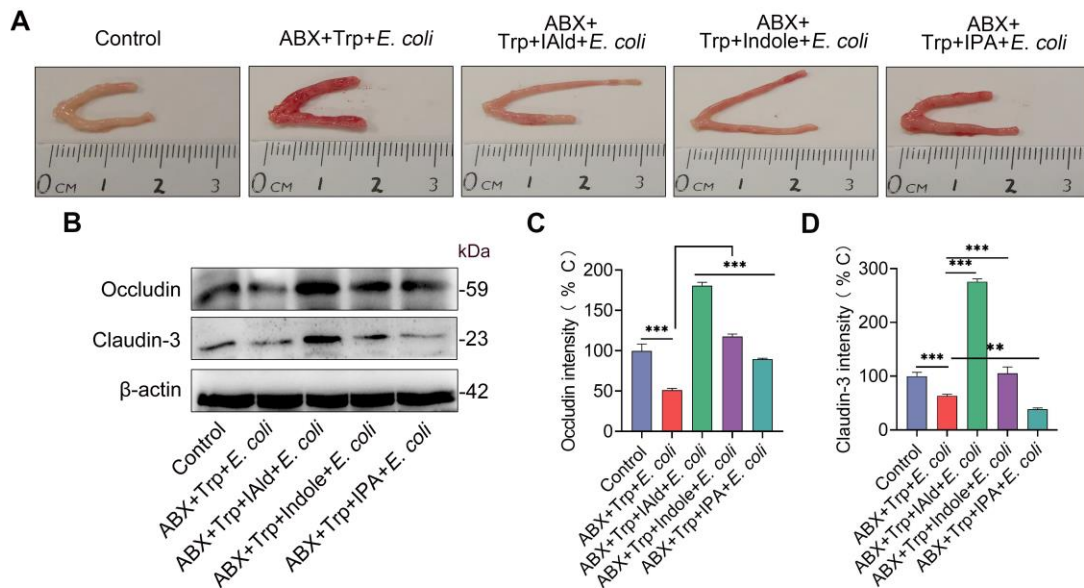

**Fig. S4** IAld, Indole and IPA increase the expression of TJ proteins in *E. coli*-induced endometritis model. **A.** Representative macroscopic images from indicated mice are shown. **B.** Levels of uterine occludin and claudin-3 from indicated groups were assessed using western blotting. **C-D.** Intensity analysis of occludin (**C**) and claudin-3 (**D**) was performed based on western blotting (n=5). Data are expressed as the mean  $\pm$  SD and one-way ANOVA (**C-D**) was performed. \*\* $p < 0.01$  and \*\*\* $p < 0.001$  indicate significant differences.

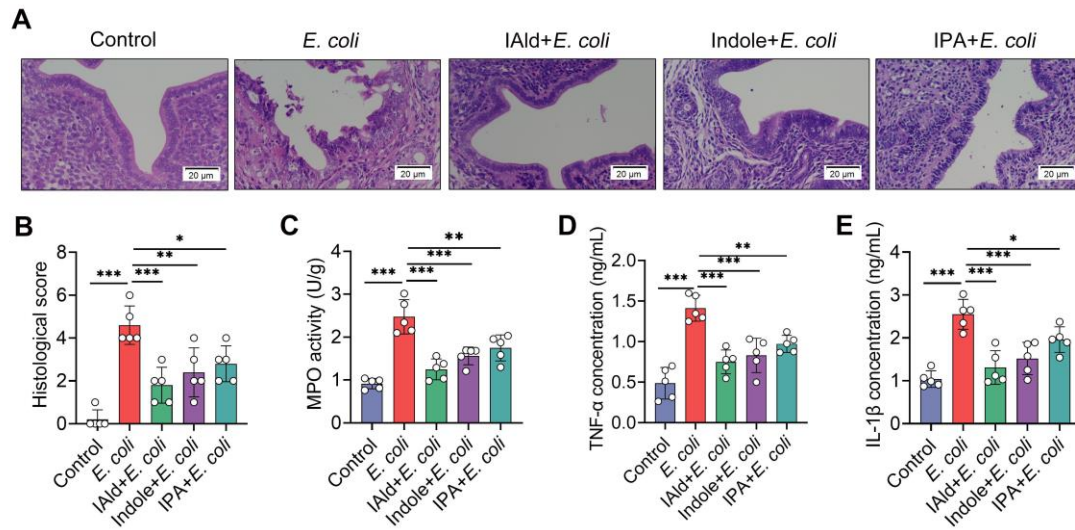

**Fig. S5 IAld, Indole and IPA alleviate *E. coli*-induced endometritis in mice.** **A.** Representative images of H&E-stained sections were shown in different treated groups (scale bar=20  $\mu$ m). **B.** Histological scores were performed based on H&E staining (n=5). **C-E.** Inflammatory markers, including MPO activity (**C**), TNF- $\alpha$  (**D**) and IL-1 $\beta$  (**E**) were determined (n=5). Data are expressed as the mean  $\pm$  SD and one-way ANOVA (**B-E**) was performed. \* $p < 0.05$ , \*\* $p < 0.01$  and \*\*\* $p < 0.001$  indicate significant differences.

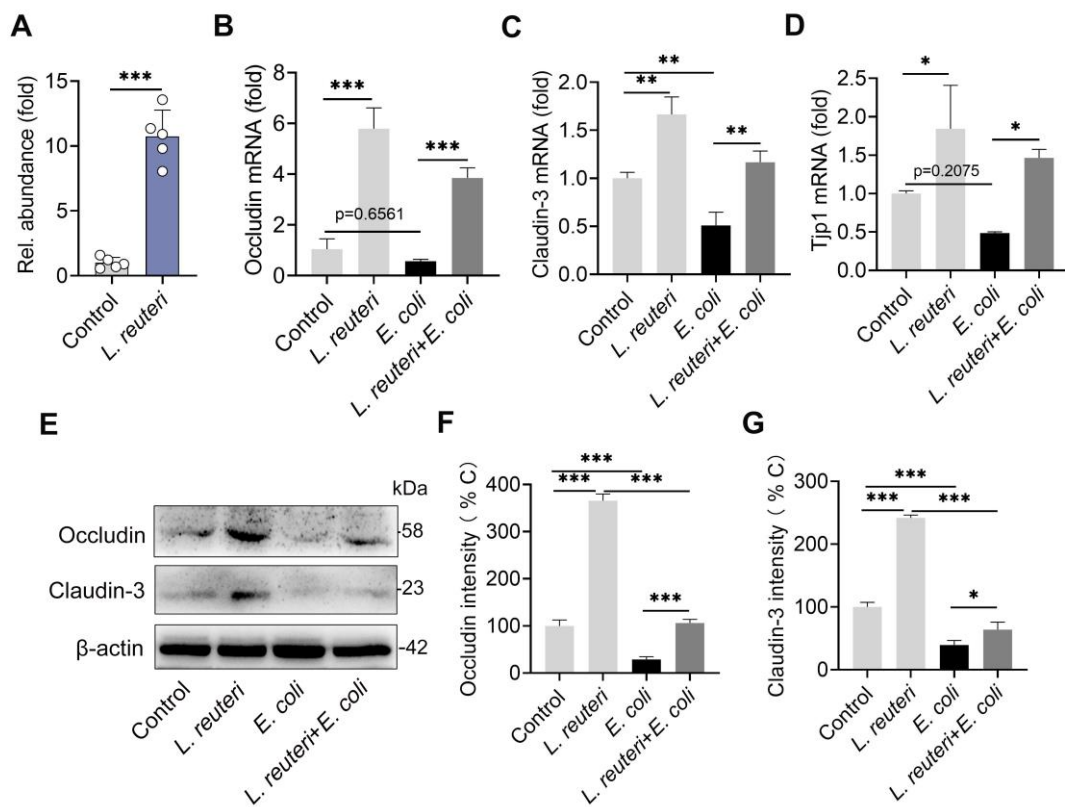

**Fig. S6 *L. reuteri* increases the expression of TJ in mouse uterine tissues.** Mice were treated with *L. reuteri* and *E. coli* and uterine tissues from indicated groups were assessed by qPCR or western blotting. **A.** Analysis of *L. reuteri* bacterial DNA isolated from fecal samples was performed in different treatment groups (n=5). The gene expression of *Occludin* (**B**), *Claudin-3* (**C**) and *Tjp1* (**D**) from different treated mice were determined using qPCR (n=5). **E.** Levels of occludin and claudin-3 from indicated groups were determined by western blotting. Intensity analysis of occludin (**F**) and claudin-3 (**G**) was performed (n=5). Data are expressed as the mean  $\pm$  SD and two-tailed Student's t test (**A**) and one-way ANOVA (**B-D** and **F-G**) were performed. \* $p < 0.05$ , \*\* $p < 0.01$  and \*\*\* $p < 0.001$  indicate significant differences.

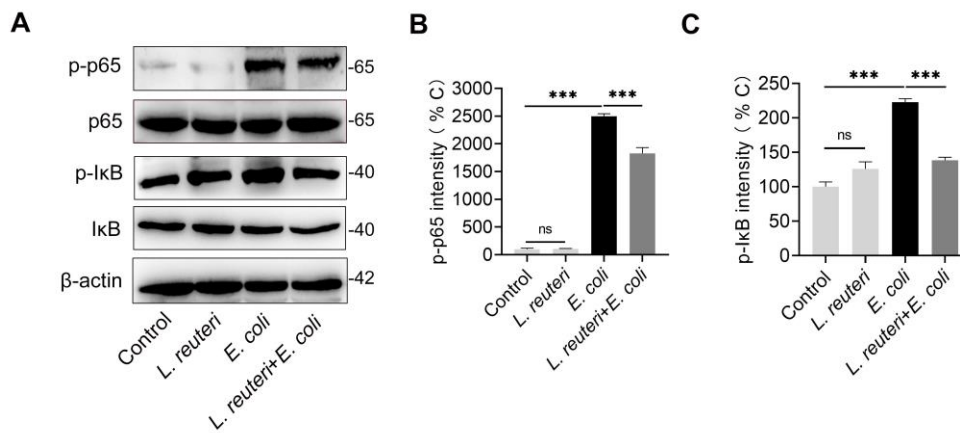

**Fig. S7 *L. reuteri* inhibits the activation of NF-κB caused by *E. coli* in uterine tissues.** **A.** The protein levels of the NF-κB pathway from indicated groups were assessed by western blotting. **B-C.** Intensity analysis of p-p65 (**B**) and p-IκB (**C**) was performed (n=5). Data are expressed as the mean  $\pm$  SD and one-way ANOVA (**B-C**) was performed. \*\*\* $p < 0.001$  indicates significant difference. ns, no significance.

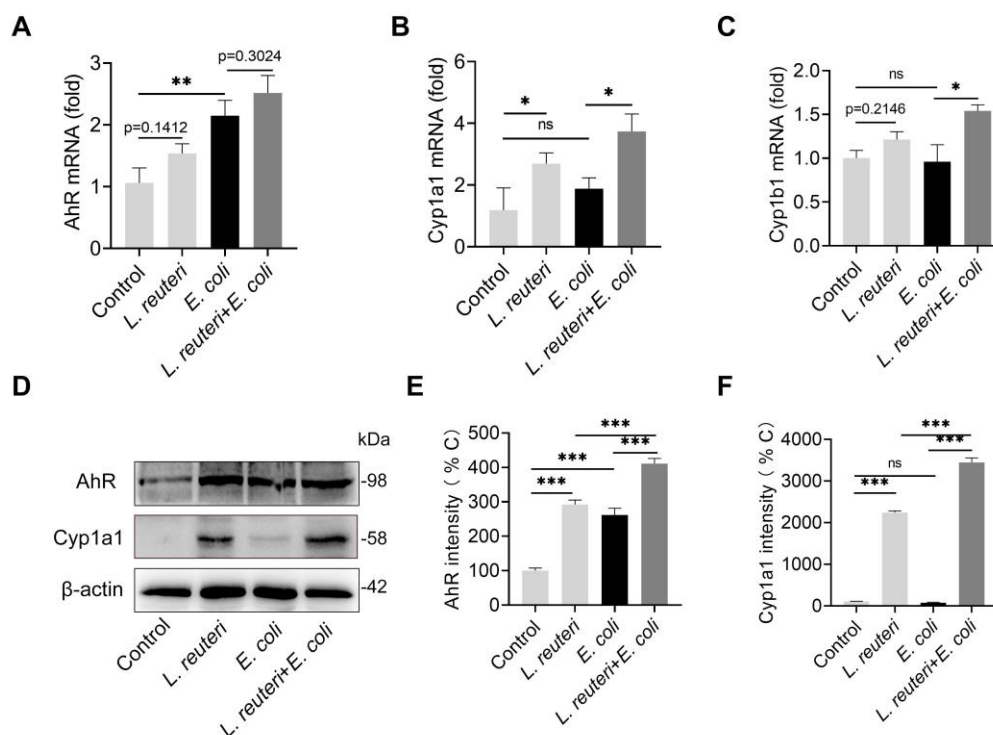

**Fig. S8** *L. reuteri* activates the AhR pathway in uterine tissues. **A-C**. The mRNA levels of *AhR* (**A**), *Cyp1a1* (**B**) and *Cyp1b1* (**C**) from different treated groups were determined by qPCR (n=5). **D**. The protein levels of AhR and Cyp1a1 from different treated groups were assessed by western blotting. Intensive analysis of AhR (**E**) and Cyp1a1 (**F**) was performed (n=5). Data are expressed as the mean  $\pm$ SD and one-way ANOVA (**A-C** and **E-F**) was performed. \* $p < 0.05$ , \*\* $p < 0.01$  and \*\*\* $p < 0.001$  indicate significant differences. ns, no significance.

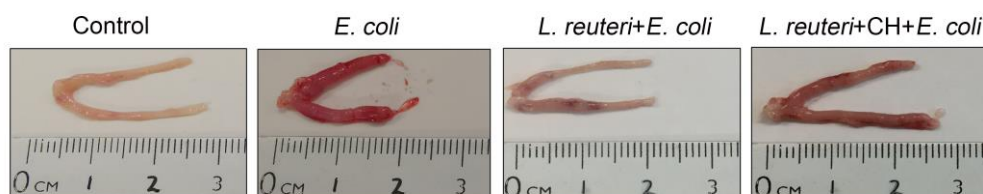

**Fig. S9** Representative macroscopic images from *L. reuteri*-treated mice are shown.

**Supplementary table S1.** The oligonucleotides used in this study.

| Gene          | Primer    | Sequence (5'-3')            |
|---------------|-----------|-----------------------------|
| <i>AhR</i>    | sense     | 5'-GAGCACAAATCAGAGACTGG-3'  |
|               | antisense | 5'-TGGAGGAAGCATAGAAGACC-3'  |
| <i>Cyp1a1</i> | sense     | 5'-CTCTTCCCTGGATGCCTTCAA-3' |
|               | antisense | 5'-GGATGTGGCCCTTCTCAAATG-3' |

|                   |           |                                         |
|-------------------|-----------|-----------------------------------------|
| <i>Cyp1b1</i>     | sense     | 5'-AATGAGGAGTTCGGGCGCACA-3'             |
|                   | antisense | 5'-GGCGTGTGGAATGGTGACAGG-3'             |
| <i>Occludin</i>   | sense     | 5'-CCCAGGCTTCTGGATCTATGT-3'             |
|                   | antisense | 5'-TCCATCTTTCTTCGGGTTTTCA-3'            |
| <i>Tjp1</i>       | sense     | 5'-GCCGCTAAGAGCACAGCAA-3'               |
|                   | antisense | 5'-TCCCCACTCTGAAAATGAGGA-3'             |
| <i>Claudin-3</i>  | sense     | 5'-ACCAACTGCGTACAAGACGAG-3'             |
|                   | antisense | 5'-CAGAGCCGCCAACAGGAAA-3'               |
| <i>L. reuteri</i> | sense     | 5'-ACCGAGAACACCGCGTTATTT-3-3'           |
|                   | antisense | 5'-CATAACTTAACCAAACAATC AAAGATTGTCT -3' |
| <i>GAPDH</i>      | sense     | 5'-AACTTTGGCATTGTGGAAGG-3'              |
|                   | antisense | 5'-ACACATTGGGGGTAGGAACA-3'              |

**Supplementary table S2.** 16S rRNA sequences obtained in this study.

| Sample name | Raw PE(#) | Raw Tags(#) | Clean Tags(#) |
|-------------|-----------|-------------|---------------|
| Control1    | 84,677    | 83,819      | 83,502        |
| Control 2   | 87,427    | 86,463      | 86,048        |
| Control 3   | 79,962    | 79,659      | 79,445        |
| Control 4   | 89,218    | 87,186      | 86,817        |
| Control 5   | 85,668    | 85,369      | 85,206        |
| Control 6   | 80,209    | 79,590      | 79,346        |
| ABX1        | 88,563    | 88,267      | 88,088        |
| ABX2        | 85,803    | 85,530      | 85,337        |
| ABX3        | 81,448    | 80,988      | 80,769        |
| ABX4        | 87,682    | 86,879      | 86,620        |
| ABX5        | 86,483    | 86,302      | 86,124        |
| ABX6        | 79,283    | 79,227      | 79,104        |

Raw PE indicates original PE reads; Raw Tags are spliced sequences of Tags; Clean Tags are sequences of Raw Tags filtered out of low quality and short length.
